# Supplementary material for: Soft crystal lattice and large anharmonicity facilitate the self-trapped excitonic emission in ultrathin 2D nanoplates of RbPb2Br5
Source: Royal Society of Chemistry journal article supplement (doi:10.1039/d2sc02992h), 2022-01-01
Supplement: d2sc02992h1.pdf [file d2sc02992h1.pdf]

## **Soft Crystal Lattice and Large Anharmonicity Facilitate the Self-Trapped Excitonic Emission in Ultrathin 2D Nanoplates of RbPb<sub>2</sub>Br<sub>5</sub>**

Jayita Pradhan,<sup>a</sup> Anustoop Das,<sup>a</sup> Kaushik Kundu,<sup>a</sup> Chahat,<sup>a</sup> and Kanishka Biswas<sup>\*ab</sup>

<sup>a</sup>New Chemistry Unit, <sup>b</sup>School of Advanced Materials and International Centre for Materials  
Science, Jawaharlal Nehru Centre for Advanced Scientific Research (JNCASR), Jakkur P.O.,  
Bangalore 560064, India.

E-mail: [kanishka@jncasr.ac.in](mailto:kanishka@jncasr.ac.in)

## Experimental Methods

**Materials.** Rubidium bromide (RbBr, 99.60%, Sigma-Aldrich), lead (II) bromide (PbBr<sub>2</sub>, 99.99%, Sigma-Aldrich), lead (II) chloride (PbCl<sub>2</sub>, 99.99 %), lead (II) iodide (PbI<sub>2</sub>, 99.99%) chloroform (CHCl<sub>3</sub>, spectroscopic grade), oleylamine (OLAm, technical grade, 90%), oleic acid (OA, technical grade, 90%) and dimethyl sulfoxide (DMSO) were used without further purification.

**Synthesis of RbPb<sub>2</sub>Br<sub>5</sub> by ligand-assisted reprecipitation (LARP) method.** In a typical synthesis, RbBr (0.1 mmol) and PbBr<sub>2</sub> (0.2 mmol) were dissolved in 3 mL DMSO in a 15 mL glass vial to form a clear precursor solution. Then 5 mL chloroform was taken in another 15 mL vial and 500  $\mu$ L of precursor solution was added rapidly into chloroform under vigorous stirring. The crude solution was centrifuged for 5 min at 6000 rpm, and the upper part of solution was discarded after centrifugation. The precipitate was redispersed in chloroform and again centrifuged at 6000 rpm for 5 min. Finally, the precipitate was collected as a final product and used for further characterization. In the ligand-assisted reaction, 0.5 mL OA and 30  $\mu$ L OLAm were added to the precursor solution and stirred before injection into 5 mL of chloroform. Next steps were similar to the above-mentioned process.

**Synthesis of RbPb<sub>2</sub>Br<sub>5</sub>, RbPb<sub>2</sub>Br<sub>4</sub>I and RbPb<sub>2</sub>Cl<sub>2</sub>Br<sub>3</sub> by solid state mechanochemical grinding.** In a typical synthesis of bulk powder of RbPb<sub>2</sub>Br<sub>5</sub>, 183.9 mg RbBr and 816.1 mg PbBr<sub>2</sub> were taken in a mortar pestle and grounded mechanically for 2 hr. To synthesize RbPb<sub>2</sub>Br<sub>4</sub>I, 224.4 mg RbI and 775.6 mg PbBr<sub>2</sub> were grounded mechanically in mortar pestle for 2 hr. RbPb<sub>2</sub>Cl<sub>2</sub>Br<sub>3</sub> was synthesized by grinding of 204 mg RbBr, 452.8 mg PbBr<sub>2</sub> and 343.1 mg PbCl<sub>2</sub> in a mortar pestle for 2 hr. All grindings were performed in an ambient condition.

**Powder X-ray diffraction (PXRD).** Rigaku Smart Lab diffractometer was used to collect PXRD patterns at room temperature using Cu K $\alpha$  radiation ( $\lambda = 1.5406 \text{ \AA}$ ) with accelerating voltage of 40 kV (current of 30 mA).

**Thermogravimetric analysis (TGA).** Thermogravimetric analysis was carried out using a 2 STAR TGA instrument, in which the samples were heated in N<sub>2</sub> atmosphere (40 mL min<sup>-1</sup>) at a rate of 5  $^{\circ}$ C min<sup>-1</sup> in the temperature range of 25–900  $^{\circ}$ C.

**Fourier transform infrared spectroscopy (FTIR).** FTIR spectra were recorded in the range of 400–4000 cm<sup>-1</sup> by using a Bruker Optics Alpha-P FTIR spectrophotometer equipped with an attenuated total reflectance (ATR) module.

**Transmission electron microscopy (TEM).** The TEM measurement was performed using a JEOL (JEM3010) TEM instrument (200 kV accelerating voltage) fitted with a Gatan CCD camera.

**Atomic force microscopy (AFM).** AFM imaging was carried out using Asylum Research MFP-3D AFM in tapping mode using AC160TS silicon probes, with nominal tip radii <10 nm.

**Field emission scanning electron microscopy (FESEM).** FESEM images were acquired by a ZEISS Gemini SEM – Field Emission Scanning Electron Microscopy.

**Raman spectroscopy.** Raman spectroscopy measurements of the powder sample were carried out with a Renishaw spectrometer. The excitation wavelength of the laser was 532 nm.

**Sound velocity measurement.** The longitudinal ( $v_l$ ) and transverse ( $v_t$ ) sound velocities were measured on a disc shaped sample by using an Epoch 650 Ultrasonic Flaw Detector (Olympus) instrument with the transducer frequency of 5 MHz.

The Poisson's ratio ( $\nu_p$ ) is linked with the sound velocities by this following equation,

$$\nu_p = \frac{1 - 2\left(\frac{v_t}{v_l}\right)^2}{2 - 2\left(\frac{v_t}{v_l}\right)^2}$$

The Grüneisen parameter ( $\gamma$ ) was calculated using the following equation,

$$\gamma = \frac{3}{2} \cdot \frac{1 + \nu_p}{2 - 3\nu_p}$$

**Optical spectroscopy.** Electronic absorption spectroscopy of RbPb<sub>2</sub>Br<sub>5</sub> nanoplates (NPLs) solution in CHCl<sub>3</sub> was performed by PerkinElmer, Lambda-900 UV/vis/near-IR spectrometer. Diffuse reflectance measurements were carried out to estimate the optical band gap for solid samples in the range of 250–800 nm by using a Perkin-Elmer Lambda 900 UV/Vis/near-IR spectrometer in reflectance mode. By using the Kubelka-Munk equation, absorption ( $\alpha/S$ ) data was calculated from reflectance data:  $\alpha/S = (1-R)^2/(2R)$ , where R is the reflectance,  $\alpha$  and S are the absorption and scattering coefficients respectively. The band gap for solid sample were derived from  $\alpha/S$  vs. E (eV) plots.

All the photoluminescence measurements of the RbPb<sub>2</sub>Br<sub>5</sub> NPLs solution in CHCl<sub>3</sub> and solid samples were recorded on an Edinburgh FLS1000 spectrofluorometer. Temperature-

dependent PL measurements ranging from 15 to 350 K were carried out using a vacuum cryostat. The TRPL decays of RbPb<sub>2</sub>Br<sub>5</sub> NPL and bulk polycrystal were recorded at 370 nm excitation on Edinburgh FLS1000 spectrofluorometer instrument coupled with pulsed Xenon microsecond flash-lamp. The bi-exponential PL decay curves can be represented according to the following equation,

$$A(t) = A_1 e^{(-t/\tau_1)} + A_2 e^{(-t/\tau_2)}$$

where, A is the intensity of the emission at given time t. A<sub>1</sub> and A<sub>2</sub> are fitting parameters (i.e., relative amplitude for the different lifetime component), and  $\tau_1$  and  $\tau_2$  represent different lifetime components. The average lifetime ( $\tau_{avg.}$ ) values of NPLs were calculated by following equation:

$$\tau_{avg.} = \frac{A_1 \tau_1^2 + A_2 \tau_2^2}{A_1 \tau_1 + A_2 \tau_2}$$

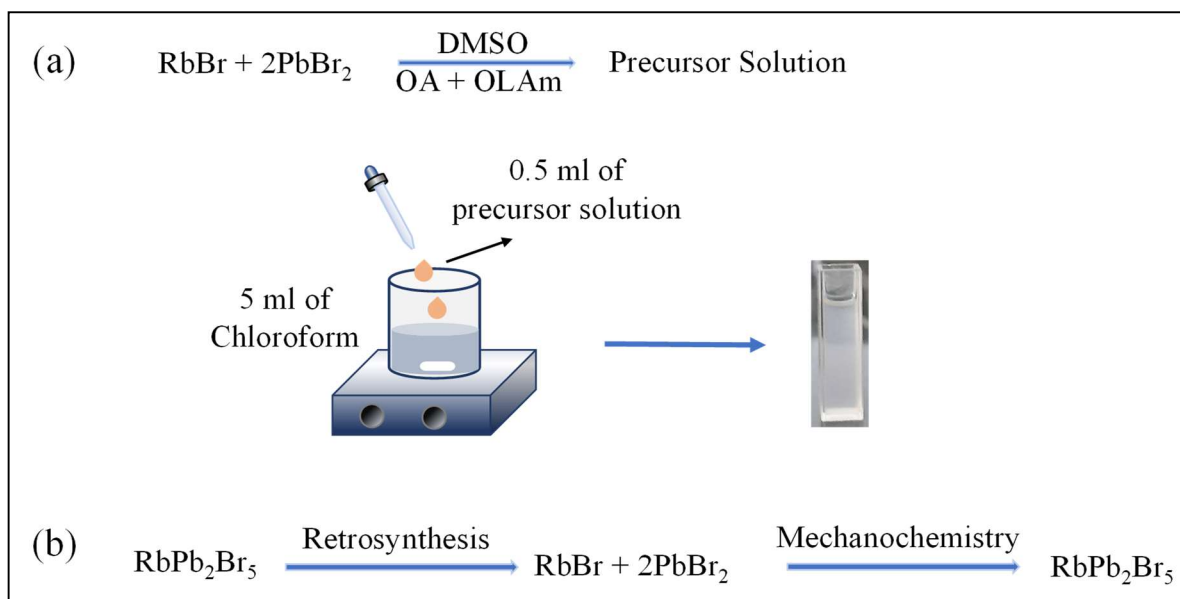

**Scheme S1.** Synthesis scheme of  $\text{RbPb}_2\text{Br}_5$  via (a) ligand-assisted re-precipitation (LARP) method, and (b) solid state mechanochemical grinding approach.

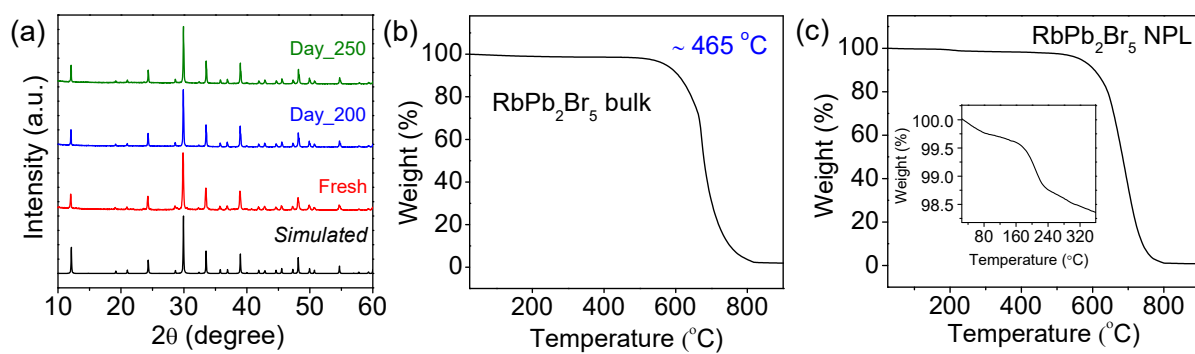

**Fig. S1.** (a) PXRD patterns of as-synthesized  $\text{RbPb}_2\text{Br}_5$  bulk powder and after keeping in ambient conditions for 200 and 250 days. Thermogravimetric analysis (TGA) of (b) bulk  $\text{RbPb}_2\text{Br}_5$  polycrystals and (c) NPLs. Inset in (c) shows zoomed lower temperature region.

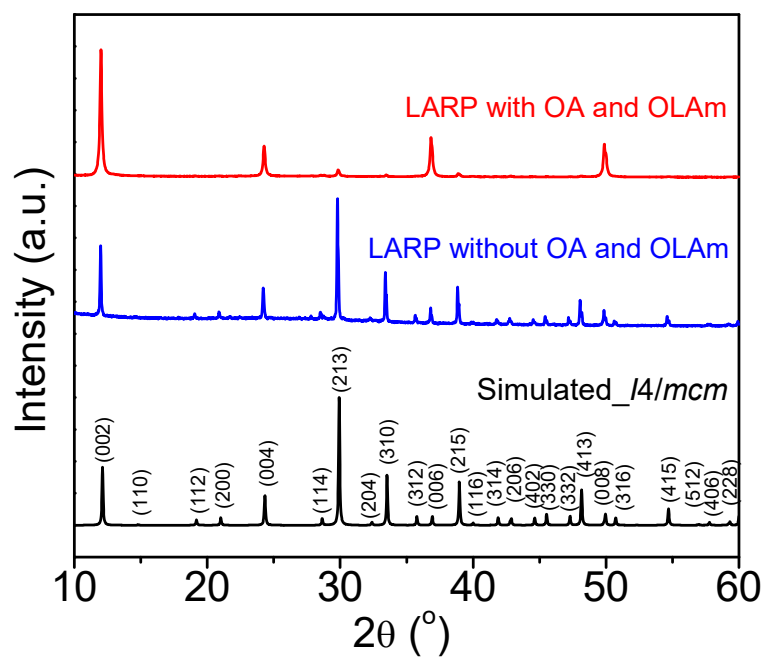

**Fig. S2.** PXRD patterns of  $\text{RbPb}_2\text{Br}_5$  synthesized by LARP method with and without the addition of OA and OLAm.

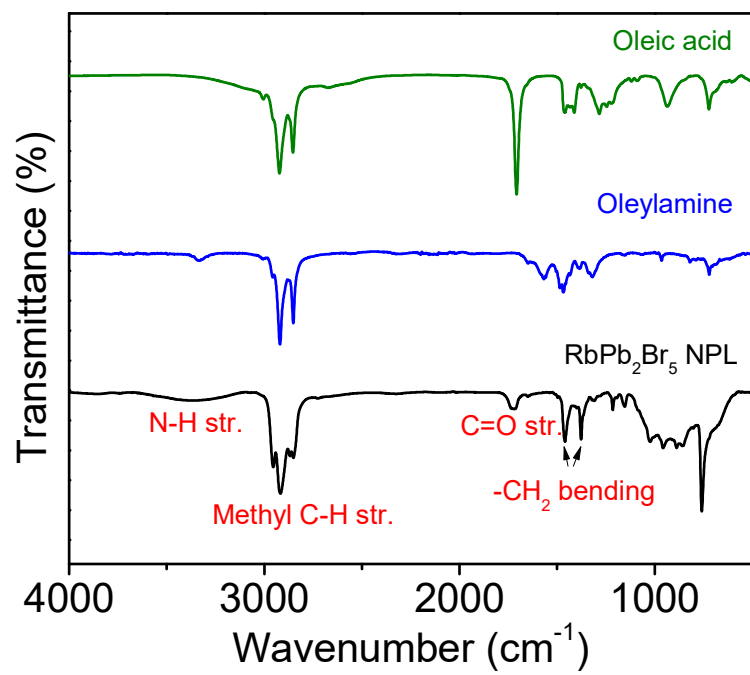

**Fig. S3.** FTIR spectra of RbPb<sub>2</sub>Br<sub>5</sub> nanoplates (NPLs); and for pure OLAm and OA.



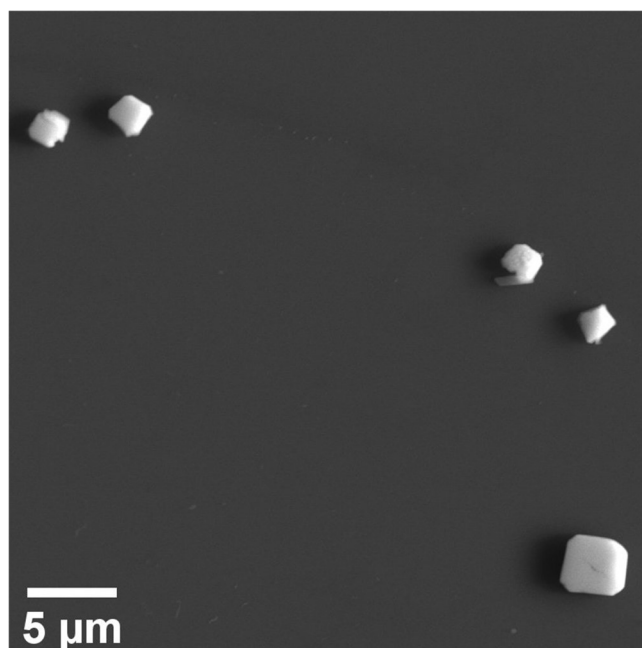

**Fig. S4.** FESEM image of RbPb<sub>2</sub>Br<sub>5</sub> obtained *via* LARP method without the addition of OA and OLAm.

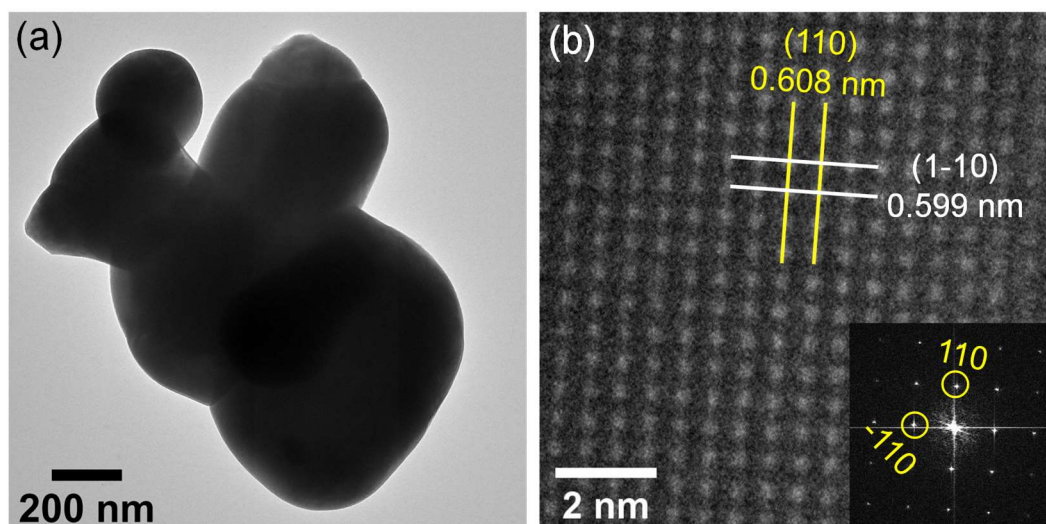

**Fig. S5.** (a) TEM image of  $\text{RbPb}_2\text{Br}_5$  bulk polycrystal. (b) HRTEM image of the bulk polycrystal exhibiting slight deviation between interplanar distances along (110) and (1-10) directions. Inset: Fast Fourier transformation (FFT) of the HRTEM image.

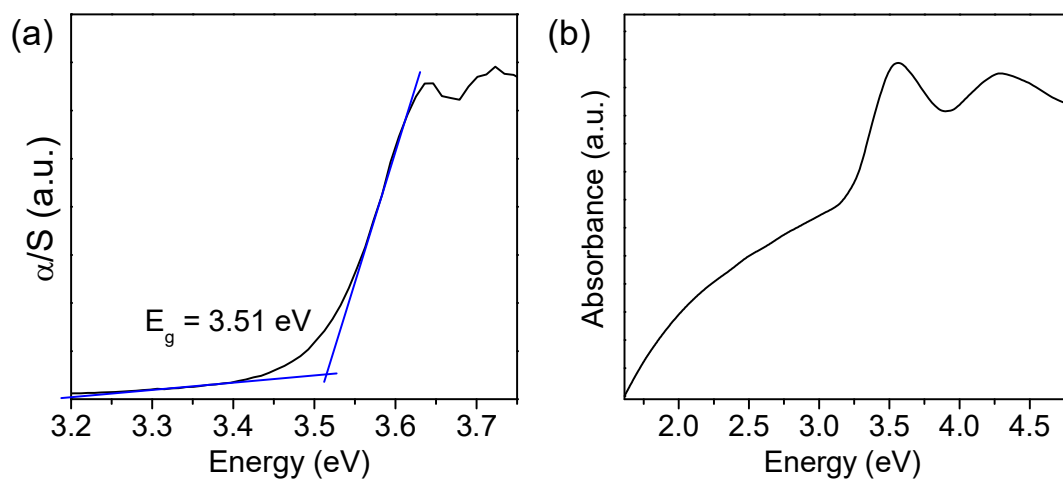

**Fig. S6.** (a) Solid-state electronic absorption of bulk RbPb<sub>2</sub>Br<sub>5</sub> polycrystals. (b) Optical absorption spectrum of RbPb<sub>2</sub>Br<sub>5</sub> NPLs in solution.

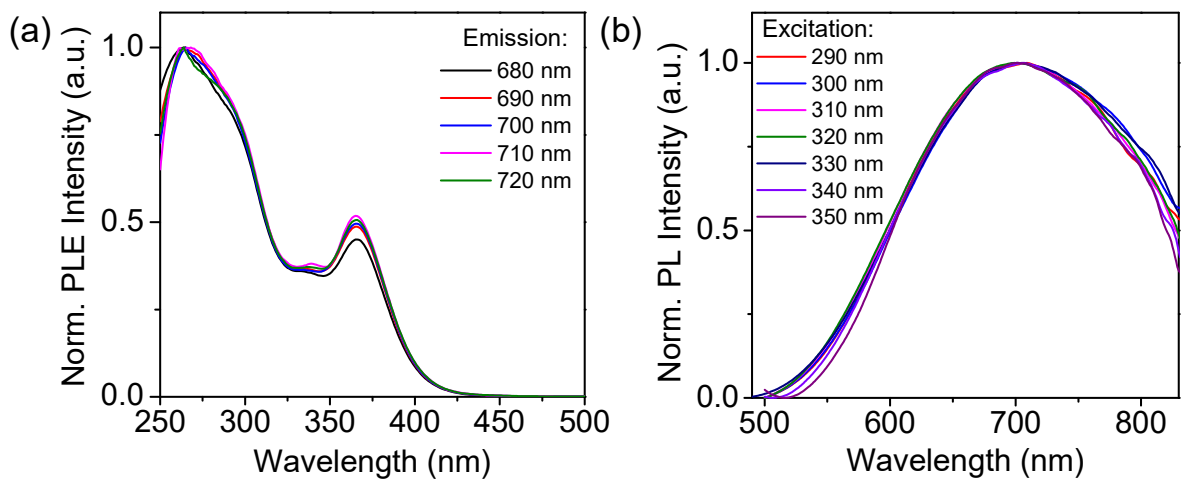

**Fig. S7.** Wavelength-dependent (a) excitation and (b) emission spectra of bulk RbPb<sub>2</sub>Br<sub>5</sub> polycrystals at room temperature.

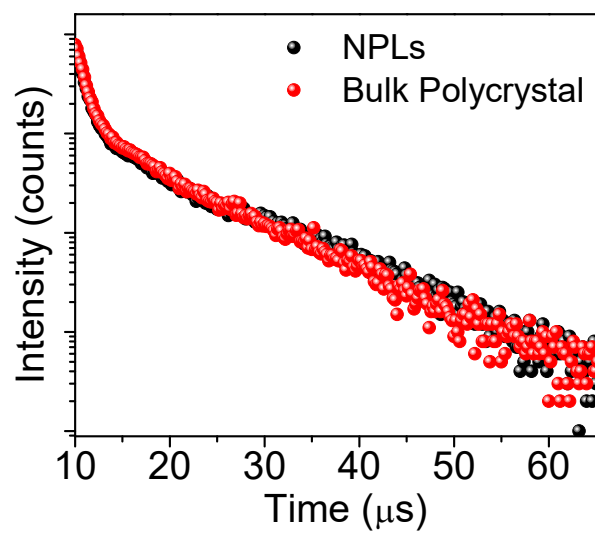

**Fig. S8.** TRPL spectra for RbPb<sub>2</sub>Br<sub>5</sub> NPLs and bulk polycrystal at room temperature.

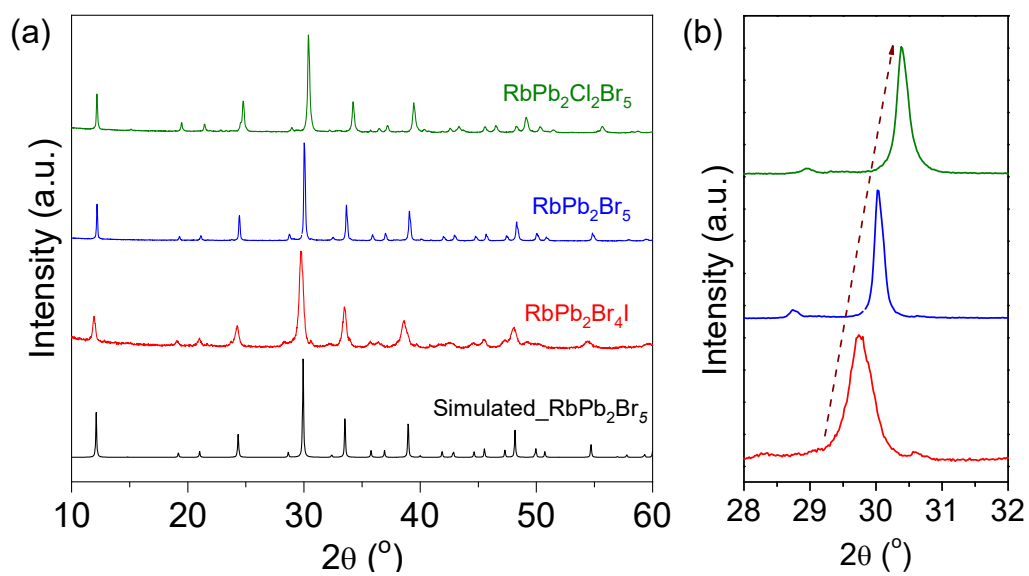

**Fig. S9.** (a) PXRD patterns along with the (b) peak shifting of RbPb<sub>2</sub>Br<sub>5</sub>, RbPb<sub>2</sub>Br<sub>4</sub>I, and RbPb<sub>2</sub>Cl<sub>2</sub>Br<sub>3</sub> bulk polycrystals.

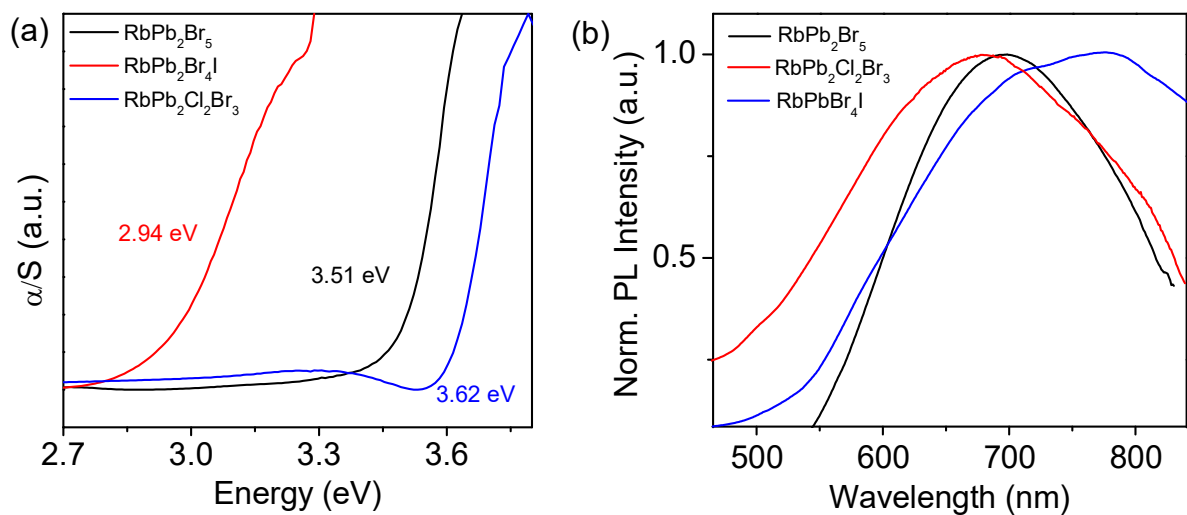

**Fig. S10.** (a) Solid-state electronic absorption ( $\alpha/S$ ) spectra and (b) emission spectra of  $\text{RbPb}_2\text{Br}_5$ ,  $\text{RbPb}_2\text{Br}_4\text{I}$ , and  $\text{RbPb}_2\text{Cl}_2\text{Br}_3$  bulk polycrystals at room temperature.

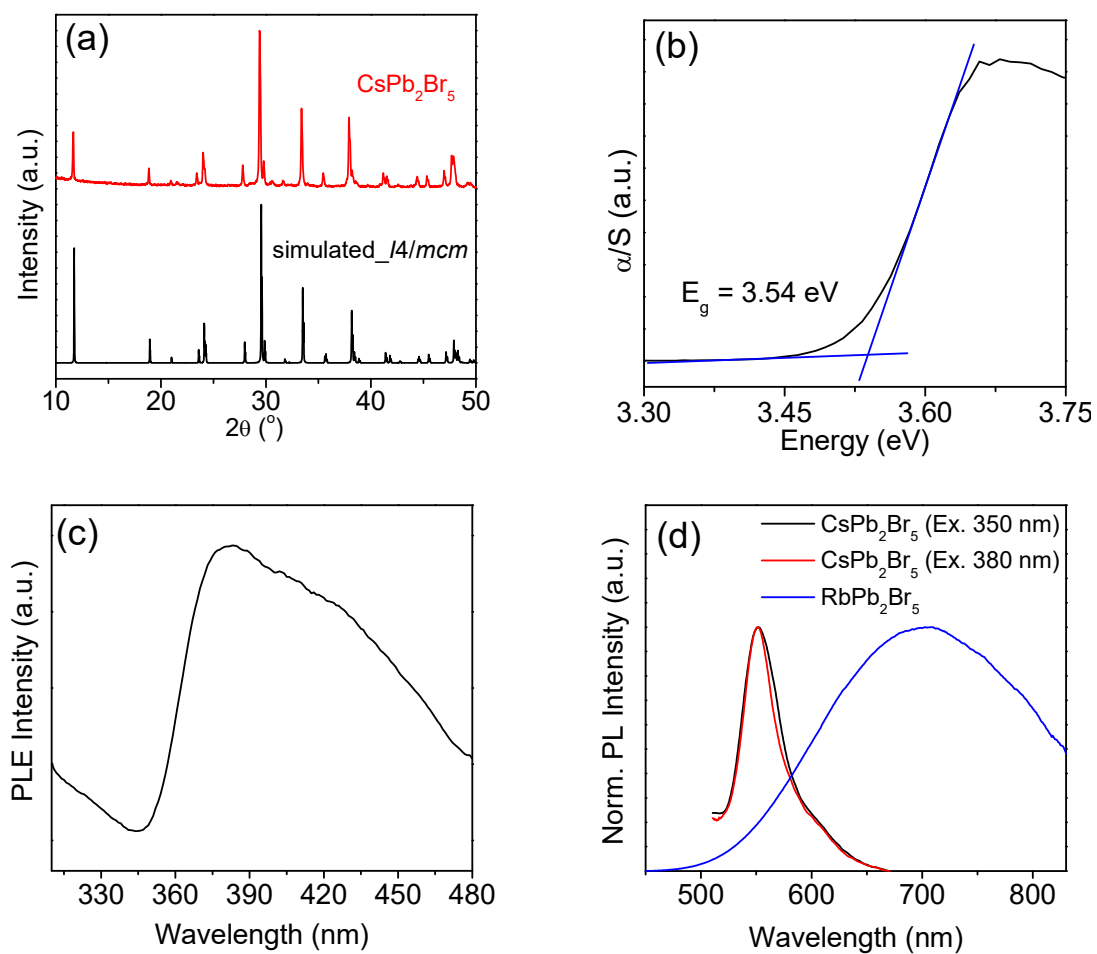

**Fig. S11.** (a) PXRD pattern, (b) solid-state electronic absorption spectrum ( $\alpha/S$ ) of  $\text{CsPb}_2\text{Br}_5$ . (c) Photoluminescence excitation (PLE) spectrum. (d) Comparison of the PL spectra of  $\text{CsPb}_2\text{Br}_5$  and  $\text{RbPb}_2\text{Br}_5$  bulk polycrystal at room temperature.



**Table S1.** Comparison of measured sound velocity of present RbPb<sub>2</sub>Br<sub>5</sub> sample with that of reported values other metal halides.

| <b>Material</b>                                  | <b>Longitudinal sound velocity (<math>v_l</math>) (m/s)</b> | <b>Transverse sound velocity (<math>v_t</math>) (m/s)</b> | <b>Method</b>       | <b>References</b> |
|--------------------------------------------------|-------------------------------------------------------------|-----------------------------------------------------------|---------------------|-------------------|
| MASnI <sub>3</sub>                               | 2469-3177                                                   | 1249-1855                                                 | Theoretical         | Ref. 1            |
| MASnBr <sub>3</sub>                              | 3172-3605                                                   | 1584-2043                                                 | Theoretical         | Ref. 1            |
| CsSnI <sub>3</sub>                               | 1549                                                        | 967                                                       | Experimental        | Ref. 2            |
| CsSnBr <sub>3</sub>                              | 2422                                                        | 1141                                                      | Experimental        | Ref. 2            |
| FAPbI <sub>3</sub>                               | 1650±150                                                    | 800±50                                                    | INS (Exp)           | Ref. 3            |
| FAPbBr <sub>3</sub>                              | 2700±80                                                     | 900-1400                                                  | INS (Exp)           | Ref. 3            |
| MAPbI <sub>3</sub>                               | 2300±70                                                     | 1330±30                                                   | INS (Exp)           | Ref. 3            |
| MAPbBr <sub>3</sub>                              | 3000±50                                                     | 1130-1320                                                 | INS (Exp)           | Ref. 3            |
| Cs <sub>2</sub> PbI <sub>2</sub> Cl <sub>2</sub> | 2460                                                        | 1360                                                      | Theoretical         | Ref. 4            |
| <b>RbPb<sub>2</sub>Br<sub>5</sub></b>            | <b>1744</b>                                                 | <b>980</b>                                                | <b>Experimental</b> | <b>This work</b>  |

**Table S2.** Comparison of reported PLQY of other 2D lead halide perovskites with that of present work.

| <b>Material</b>                                                                            | <b>Dimensionality</b> | <b>PLQY</b>  | <b>References</b> |
|--------------------------------------------------------------------------------------------|-----------------------|--------------|-------------------|
| (4NPEA) <sub>2</sub> PbI <sub>4</sub><br>(4NPEA = 4-nitrophenylethylammonium)              | 2D                    | (0.4 ± 0.1)% | Ref. 5            |
| (EDBE)PbBr <sub>4</sub><br>(EDBE = 2,2'-<br>(ethylenedioxy)bis(ethylammonium))             | 2D                    | 9%           | Ref. 6            |
| PEA <sub>2</sub> PbI <sub>4</sub><br>(PEA = phenylethylammonium)                           | 2D                    | 0.7%         | Ref. 7            |
| (N-MEDA)[PbBr <sub>4</sub> ]<br>(N-MEDA = N <sup>1</sup> -methylethane-1,2-<br>diammonium) | 2D                    | ~0.5%        | Ref. 8            |
| (NMEDA)[PbBr <sub>2.8</sub> Cl <sub>1.2</sub> ]                                            | 2D                    | 1.5 %        | Ref. 8            |
| <b>RbPb<sub>2</sub>Br<sub>5</sub></b>                                                      | <b>2D</b>             | <b>13%</b>   | <b>This work</b>  |

**Table S3.** Comparison of reported electron-longitudinal optical phonon coupling constant for other halides with that of present work.

| Material                                                                                                           | $\gamma_{LO}$ (meV) | Dimensionality | References       |
|--------------------------------------------------------------------------------------------------------------------|---------------------|----------------|------------------|
| Rb <sub>3</sub> BiCl <sub>6</sub>                                                                                  | 693                 | 0D             | Ref. 9           |
| Rb <sub>3</sub> BiCl <sub>6</sub> :4.5%Sb                                                                          | 347                 | 0D             | Ref. 9           |
| (C <sub>4</sub> H <sub>14</sub> N <sub>2</sub> ) <sub>2</sub> In <sub>2</sub> Br <sub>10</sub>                     | 178                 | 0D             | Ref. 10          |
| (C <sub>6</sub> H <sub>8</sub> N <sub>3</sub> ) <sub>2</sub> Pb <sub>2</sub> Br <sub>10</sub> ·H <sub>2</sub> O    | 150                 | 1D             | Ref. 11          |
| (F <sub>2</sub> CHCH <sub>2</sub> NH <sub>3</sub> ) <sub>2</sub> Cd <sub>x</sub> Pb <sub>1-x</sub> Br <sub>4</sub> | 467                 | 2D             | Ref. 12          |
| Cs <sub>3</sub> Bi <sub>2</sub> I <sub>6</sub> Cl <sub>3</sub>                                                     | 291.8               | 2D             | Ref. 13          |
| (C <sub>6</sub> H <sub>5</sub> C <sub>2</sub> H <sub>4</sub> NH <sub>3</sub> ) <sub>2</sub> PbCl <sub>4</sub>      | 265                 | 2D             | Ref. 14          |
| (PEA) <sub>2</sub> (CsPbBr <sub>3</sub> ) <sub>n-1</sub> PbBr <sub>4</sub>                                         | 204-302             | 2D             | Ref. 15          |
| Cs <sub>2</sub> AgBiBr <sub>6</sub>                                                                                | 226                 | 3D             | Ref. 16          |
| FAPbI <sub>3</sub>                                                                                                 | 40                  | 3D             | Ref. 17          |
| FAPbBr <sub>3</sub>                                                                                                | 61                  | 3D             | Ref. 17          |
| MAPbI <sub>3</sub>                                                                                                 | 40                  | 3D             | Ref. 17          |
| MAPbBr <sub>3</sub>                                                                                                | 58                  | 3D             | Ref. 17          |
| <b>RbPb<sub>2</sub>Br<sub>5</sub></b>                                                                              | <b>431</b>          | <b>2D</b>      | <b>This work</b> |

**Table S4.** Fitted lifetime values using a bi-exponential decay with the relative amplitude of each component and average lifetime of RbPb<sub>2</sub>Br<sub>5</sub> NPL and bulk polycrystal at room temperature.

| <b>Sample</b>    | <b><math>\tau_1</math> (<math>\mu\text{s}</math>)</b> | <b><math>\tau_2</math> (<math>\mu\text{s}</math>)</b> | <b><math>A_1</math>(%)</b> | <b><math>A_2</math>(%)</b> | <b><math>\tau_{avg.}</math> (<math>\mu\text{s}</math>)</b> |
|------------------|-------------------------------------------------------|-------------------------------------------------------|----------------------------|----------------------------|------------------------------------------------------------|
| Nanoplate        | 1.47                                                  | 10.25                                                 | 15.01                      | 84.99                      | 10.03                                                      |
| Bulk Polycrystal | 1.33                                                  | 8.99                                                  | 12.98                      | 87.02                      | 8.82                                                       |

## References

- 1 J. Feng, *APL Mater.*, 2014, **2**, 081801.
- 2 H. Xie, S. Hao, J. Bao, T. J. Slade, G. J. Snyder, C. Wolverton and M. G. Kanatzidis, *J. Am. Chem. Soc.*, 2020, **142**, 9553–9563.
- 3 A. Ferreira, A. Létoublon, S. Paofai, S. Raymond, C. Ecolivet, B. Rufflé, S. Cordier, C. Katan, M. I. Saidaminov and A. Zhumekenov, *Phys. Rev. Lett.*, 2018, **121**, 085502.
- 4 P. Acharyya, T. Ghosh, K. Pal, K. Kundu, K. Singh Rana, J. Pandey, A. Soni, U. V. Waghmare and K. Biswas, *J. Am. Chem. Soc.*, 2020, **142**, 15595–15603.
- 5 M. H. Tremblay, F. Thouin, J. Leisen, J. Bacsá, A. R. Srimath Kandada, J. M. Hoffman, M. G. Kanatzidis, A. D. Mohite, C. Silva, S. Barlow and S. R. Marder, *J. Am. Chem. Soc.*, 2019, **141**, 4521–4525.
- 6 J. E. Thomaz, K. P. Lindquist, H. I. Karunadasa and M. D. Fayer, *J. Am. Chem. Soc.*, 2020, **39**, 16622–16631.
- 7 J. Yu, J. Kong, W. Hao, X. Guo, H. He, W. R. Leow, Z. Liu, P. Cai, G. Qian, S. Li, X. Chen and X. Chen, *Adv. Mater.*, 2019, **31**, e1806385.
- 8 E. R. Dohner, E. T. Hoke and H. I. Karunadasa, *J. Am. Chem. Soc.*, 2014, **136**, 1718–1721.
- 9 L. Zhou, J.-F. Liao, Y. Qin, X.-D. Wang, J.-H. Wei, M. Li, D.-B. Kuang and R. He, *Adv. Funct. Mater.*, 2021, **31**, 2102654.
- 10 L. Zhou, J.-F. Liao, Z.-G. Huang, J.-H. Wei, X.-D. Wang, H.-Y. Chen and D.-B. Kuang, *Angew. Chem., Int. Ed.*, 2019, **58**, 15435–15440.
- 11 A. Biswas, R. Bakthavatsalam, S. R. Shaikh, A. Shinde, A. Lohar, S. Jena, R. G. Gonnade and J. Kundu, *Chem. Mater.*, 2019, **31**, 2253–2257.
- 12 B. Luo, D. Liang, S. Sun, Y. Xiao, X. Lian, X. Li, M.-D. Li, X.-C. Huang and J. Z. Zhang, *J. Phys. Chem. Lett.*, 2020, **11**, 199–205.
- 13 K. M. McCall, C. C. Stoumpos, O. Y. Kontsevoi, G. C. B. Alexander, B. W. Wessels and M. G. Kanatzidis, *Chem. Mater.*, 2019, **31**, 2644–2650.
- 14 K. Thirumal, W. K. Chong, W. Xie, R. Ganguly, S. K. Muduli, M. Sherburne, M. Asta, S. Mhaisalkar, T. C. Sum, H. S. Soo and N. Mathews, *Chem. Mater.*, 2017, **29**, 3947–3953.
- 15 H. Long, X. Peng, J. Lu, K. Lin, L.-Q. Xie, B.-P. Zhang, L. Ying and Z. Wei, *Nanoscale*, 2019, **11**, 21867–21871.

- 16 W. Kim, H. Yuan, N. H. Heo, J. Vanacken, A. Walsh, J. Hofkens and M. B. J. Roeffaers, *ACS Nano*, 2018, **12**, 8081–8090.
- 17 A. D. Wright, C. Verdi, R. L. Milot, G. E. Eperon, M. A. Pérez-Osorio, H. J. Snaith, F. Giustino, M. B. Johnston and L. M. Herz, *Nat. Commun.*, 2016, **7**, 11755.
